# Supplementary material for: Performance-Based Empathy Mediates the Influence of Working Memory on Social Competence in Schizophrenia
Source: Oxford University Press journal article supplement (doi:10.1093/schbul/sbt084), 2013-06-14
Supplement: sbt084_Supplementary_Data.zip [file sbt084_Supplementary_Data.zip]

## Supplementary Figure 1. Performance-based empathy tasks

### Instructions and Responses

#### A). Facial Affect Perception (FAP)

|                                                                                                              |                                               |
|--------------------------------------------------------------------------------------------------------------|-----------------------------------------------|
| <p>Disgust</p> 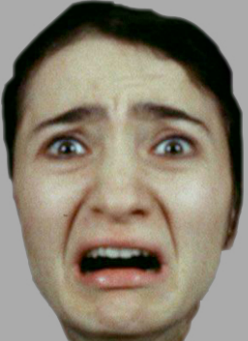 <p>Fear</p> | <p>What emotion best fits the expression?</p> |
|--------------------------------------------------------------------------------------------------------------|-----------------------------------------------|

#### B). Affective Responsiveness (AR)

|                                                |                                                                                                                                                                                                                                  |
|------------------------------------------------|----------------------------------------------------------------------------------------------------------------------------------------------------------------------------------------------------------------------------------|
| <p>Your mother dies from a severe disease.</p> | <p>How would you feel in this situation?</p> <div></div> |
|------------------------------------------------|----------------------------------------------------------------------------------------------------------------------------------------------------------------------------------------------------------------------------------|

#### C). Emotional Perspective-Taking (EPT)

|                                                                                     |                                                                                                                                                                                                                                                       |
|-------------------------------------------------------------------------------------|-------------------------------------------------------------------------------------------------------------------------------------------------------------------------------------------------------------------------------------------------------|
|  | <p>Which emotional expression fits best to the masked face?</p> <div></div> |
|-------------------------------------------------------------------------------------|-------------------------------------------------------------------------------------------------------------------------------------------------------------------------------------------------------------------------------------------------------|
